# Supplementary material for: Invasion genetics of vendace (Coregonus albula (L.)) in the Inari-Pasvik watercourse: revealing the origin and expansion pattern of a rapid colonization event
Source: PubMed Central journal article supplement (PMC3678492; doi:10.1002/ece3.552), 2013-04-12
Supplement: ece30003-1400-SD3.pdf [file ece30003-1400-SD3.pdf]

## 1 Supplementary material

2 **Table S1** Summary of sample sizes ( $N$ ), number of alleles ( $N_A$ ), observed ( $H_o$ ) and expected ( $H_e$ ) heterozygosity, and  $F_{IS}$ -estimates of the  
3 vendace populations at 10 microsatellite loci.  $F_{IS}$  \* indicate possible null alleles estimated by MICROCHECKER. Underscored and bold  
4  $F_{IS}$  values indicate significant departure from HWE before and after sequential Bonferroni corrections, respectively. Sample abbreviations  
5 as in Table 1.

| Pop |          | BFRO-018[1] | BWF1[2]      | ClaTet06[3]   | ClaTet13[3]   | Cocl-lav04[4] | Cocl-lav06[4] | Cocl-lav10[4]        | Cocl-lav27[4] | Cocl-lav49[4] | C2-157[5] |
|-----|----------|-------------|--------------|---------------|---------------|---------------|---------------|----------------------|---------------|---------------|-----------|
| Ke  | $N$      | 52          | 52           | 52            | 50            | 52            | 52            | 51                   | 52            | 52            | 52        |
|     | $N_A$    | 2           | 5            | 6             | 4             | 3             | 7             | 4                    | 2             | 12            | 2         |
|     | $H_o$    | 0.019       | 0.442        | 0.462         | 0.520         | 0.288         | 0.654         | 0.490                | 0.038         | 0.712         | 0.135     |
|     | $H_e$    | 0.019       | 0.365        | 0.615         | 0.576         | 0.302         | 0.674         | 0.588                | 0.038         | 0.708         | 0.126     |
|     | $F_{IS}$ | -0.010      | -0.212       | <u>0.249*</u> | 0.097         | 0.045         | 0.030         | 0.167                | -0.020        | <u>0.034</u>  | -0.072    |
| Si  | $N$      | 57          | 58           | 57            | 57            | 58            | 57            | 57                   | 58            | 55            | 58        |
|     | $N_A$    | 7           | 13           | 6             | 16            | 2             | 19            | 3                    | 3             | 12            | 8         |
|     | $H_o$    | 0.702       | 0.741        | 0.579         | 0.807         | 0.293         | 0.754         | 0.211                | 0.121         | 0.782         | 0.448     |
|     | $H_e$    | 0.594       | 0.796        | 0.674         | 0.896         | 0.274         | 0.874         | 0.610                | 0.114         | 0.806         | 0.449     |
|     | $F_{IS}$ | -0.181      | <u>0.068</u> | 0.141         | <u>0.099*</u> | -0.070        | <u>0.137*</u> | <b><u>0.655*</u></b> | -0.056        | 0.031         | 0.001     |
| In  | $N$      | 55          | 52           | 55            | 54            | 55            | 52            | 51                   | 55            | 55            | 55        |
|     | $N_A$    | 5           | 11           | 5             | 16            | 2             | 25            | 4                    | 4             | 11            | 6         |
|     | $H_o$    | 0.473       | 0.692        | 0.491         | 0.889         | 0.309         | 0.808         | 0.314                | 0.073         | 0.782         | 0.636     |
|     | $H_e$    | 0.469       | 0.738        | 0.573         | 0.898         | 0.261         | 0.916         | 0.596                | 0.071         | 0.808         | 0.613     |
|     | $F_{IS}$ | -0.007      | 0.062        | 0.143         | 0.010         | -0.183        | <u>0.119*</u> | <b><u>0.474*</u></b> | -0.026        | <u>0.033</u>  | -0.037    |
| Vg  | $N$      | 57          | 57           | 57            | 57            | 57            | 57            | 57                   | 57            | 57            | 57        |

|    |          |        |                      |       |                      |               |                      |                      |        |               |        |
|----|----------|--------|----------------------|-------|----------------------|---------------|----------------------|----------------------|--------|---------------|--------|
|    | $N_A$    | 7      | 9                    | 5     | 15                   | 3             | 22                   | 3                    | 3      | 8             | 6      |
|    | $H_o$    | 0.474  | 0.632                | 0.561 | 0.895                | 0.246         | 0.807                | 0.404                | 0.088  | 0.754         | 0.596  |
|    | $H_e$    | 0.482  | 0.743                | 0.603 | 0.878                | 0.217         | 0.913                | 0.600                | 0.085  | 0.812         | 0.572  |
|    | $F_{IS}$ | 0.017  | <u>0.149*</u>        | 0.068 | -0.019               | -0.130        | <b><u>0.116*</u></b> | <b><u>0.327*</u></b> | -0.034 | <u>0.071</u>  | -0.042 |
| Sb | $N$      | 54     | 53                   | 54    | 53                   | 54            | 54                   | 54                   | 53     | 54            | 54     |
|    | $N_A$    | 6      | 10                   | 6     | 16                   | 2             | 19                   | 3                    | 3      | 8             | 6      |
|    | $H_o$    | 0.500  | 0.491                | 0.574 | 0.717                | 0.389         | 0.778                | 0.333                | 0.094  | 0.630         | 0.500  |
|    | $H_e$    | 0.431  | 0.716                | 0.661 | 0.873                | 0.335         | 0.899                | 0.501                | 0.091  | 0.784         | 0.604  |
|    | $F_{IS}$ | -0.159 | <b><u>0.315*</u></b> | 0.132 | <b><u>0.178*</u></b> | <u>-0.160</u> | 0.135*               | <b><u>0.335*</u></b> | -0.037 | <u>0.197*</u> | 0.173* |

6 [1] Susnik et al. 1999; [2] Patton et al. 1997; [3] Winkler & Weiss 2008; [4] Rogers et al. 2004; [5] Turgeon et al. 1999

7

8

9

10

11

12

13

14

15

16

17 **Table S2** Geographical distances and expansion times of vendace populations used for the Mantel test. Sample abbreviations as in Table 1.

|        | Geographical distance (km) | Time (years)        |                |                |
|--------|----------------------------|---------------------|----------------|----------------|
|        |                            | Initial_observation | Total_coverage | Peak_abundance |
| Si_In  | 302                        | 8                   | 8              | 8              |
| Si_Vgt | 334                        | 26                  | 26             | 26             |
| Si_Sb  | 383                        | 28                  | 28             | 28             |
| In_Vgt | 47                         | 18                  | 11             | 2              |
| In_Sb  | 95                         | 20                  | 13             | 4              |
| Vgt_Sb | 51                         | 2                   | 2              | 2              |

18

19

20

21

22

23

24 **Table S3** Estimates of genetic differentiation between the five populations of vendace revealed by  $F_{ST}$  (Below diagonal) and the  
 25 permuted (10,000)  $P$ -values (above diagonal). Significance levels ( $P$ -values) were adjusted according to the sequential Bonferroni  
 26 procedure (Rice 1989). Sample codes as in Table I.

|    | Ke    | Si     | In     | Vg     | Sb     |
|----|-------|--------|--------|--------|--------|
| Ke | -     | 0.0001 | 0.0001 | 0.0001 | 0.0001 |
| Si | 0.141 | -      | 0.0027 | 0.0013 | 0.0014 |
| In | 0.158 | 0.011  | -      | 0.0015 | 0.0032 |
| Vg | 0.154 | 0.011  | 0.011  | -      | 0.1603 |
| Sb | 0.157 | 0.012  | 0.011  | 0.004  | -      |

27

28 **Fig. S1.** Summary of results from STRUCTURE for inferring  $K$  populations among the tested  
29 vendace populations when omitting three loci that may be associated with null alleles. The  
30 most likely grouping was estimated by 5 independent runs for each  $K$  (A). In B the genetic  
31 structure among L. Kelujärvi (Ke), L. Sinettäjärvi (Si), L. Inari (In), L. Vaggatem (Vg) and L.  
32 Skrukkebukta (Sb) was tested using the same set of seven loci and Bayesian clustering  
33 assuming two genetic clusters of individuals ( $K = 2$ ). In the STRUCTURE analysis black  
34 lines separate individuals from different sampling sites and each individual is represented by a  
35 thin horizontal line, which is partitioned into  $K$ -coloured segments representing individual's  
36 estimated membership fractions in  $K$  clusters.

37

A

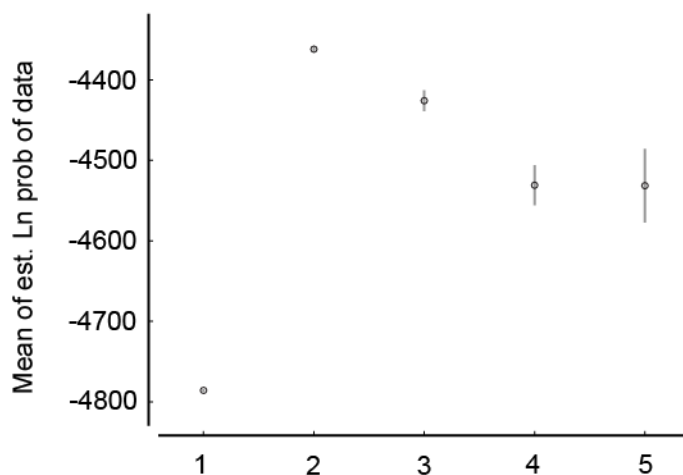

B

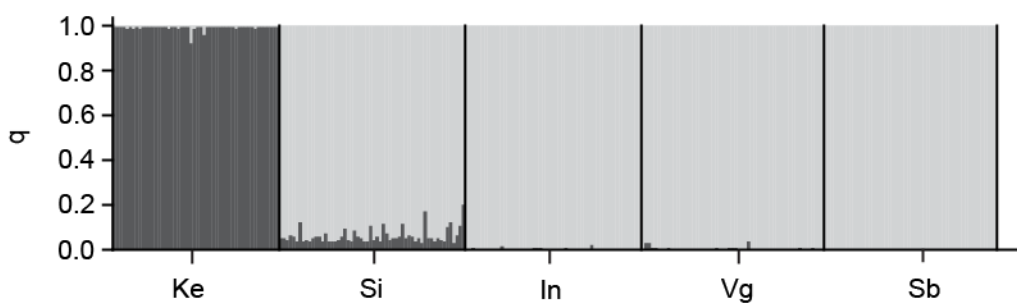

38

39

40 **Fig. S2** Summary of results from STRUCTURE for inferring K populations among the tested  
41 vendace populations. The most likely grouping was estimated by 10 independent runs for  
42 each K.

43

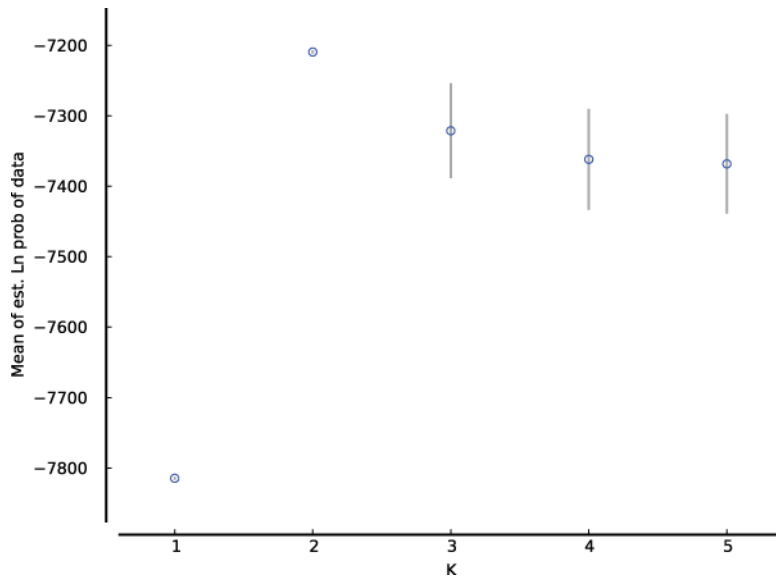

44

45

46

## 47 **References**

48

49 Patton JC, Gallaway BJ, Fechhelm RG, Cronin MA (1997) Genetic variation of  
50 microsatellite and mitochondrial DNA markers in broad whitefish (*Coregonus nasus*)  
51 in the Colville and Sagavanirktok rivers in northern Alaska. *Canadian Journal of*  
52 *Fisheries and Aquatic Sciences* **54**, 1548-1556.

53 Rogers SM, Marchand MH, Bernatchez L (2004) Isolation, characterization and cross-  
54 salmonid amplification of 31 microsatellite loci in the lake whitefish (*Coregonus*  
55 *clupeaformis*, Mitchill). *Molecular Ecology Notes* **4**, 89-92.

56 Susnik S, Snoj A, Dovc P (1999) Microsatellites in grayling (*Thymallus thymallus*):  
57 comparison of two geographically remote populations from the Danubian and Adriatic  
58 river basin in Slovenia. *Molecular Ecology* **8**, 1756-1758.

59 Turgeon J, Estoup A, Bernatchez L (1999) Species flock in the North American Great Lakes:  
60 Molecular ecology of Lake Nipigon Ciscoes (Teleostei : Coregonidae : Coregonus).  
61 *Evolution* **53**, 1857-1871.

62 Winkler KA, Weiss S (2008) Eighteen new tetranucleotide microsatellite DNA markers for  
63 *Coregonus lavaretus* cloned from an alpine lake population. *Molecular Ecology*  
64 *Resources* **8**, 1055-1058.

65

66
